# Supplementary material for: Facile fabrication of flexible graphene/porous carbon microsphere hybrid films and their application in supercapacitors
Source: Royal Society of Chemistry journal article supplement (doi:10.1039/c6ra19952f), 2016-01-01
Supplement: c6ra19952f1.pdf [file c6ra19952f1.pdf]

## **Facile fabrication of flexible graphene/porous carbon microsphere hybrid films and their application for supercapacitors**

Hongbo Ren<sup>1</sup>, Jiayi Zhu<sup>1,\*</sup>, Yutie Bi<sup>1</sup>, Yewei Xu<sup>2</sup>, Lin Zhang<sup>1,2,3,\*</sup>

*(1. Joint Laboratory for Extreme Conditions Matter Properties, Southwest University of Science and Technology and Research Center of Laser Fusion, Mianyang 621010, China;*

*2. School of Material Science and Engineering, Southwest University of Science and Technology, Mianyang 621010, China;*

*3. Research Center of Laser Fusion, China Academy of Engineering Physics, Mianyang 621900, China)*

*\*Corresponding author. E-mail: zhuyu416my@sina.com; zhlmy@sina.com*

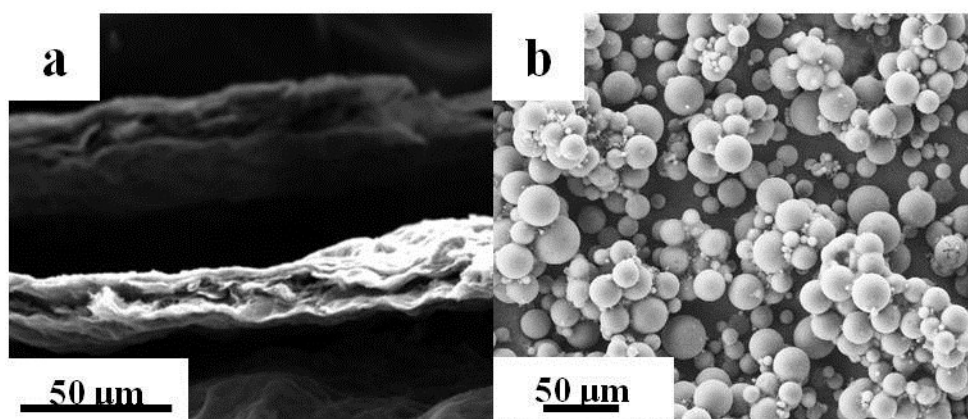

Figure S1. SEM images of (a) the pure graphene film and (b) porous carbon microspheres, respectively
